# Supplementary material for: Emerging human respiratory syncytial virus genotype ON1 found in infants with pneumonia in Beijing, China
Source: PubMed Central journal article supplement — Emerg Microbes Infect. 2013 Apr 24;2(4):e22–. doi: 10.1038/emi.2013.19 (PMC3639546; doi:10.1038/emi.2013.19), 2013-04-24
Supplement: emi201319x1.pdf [file emi201319x1.pdf]

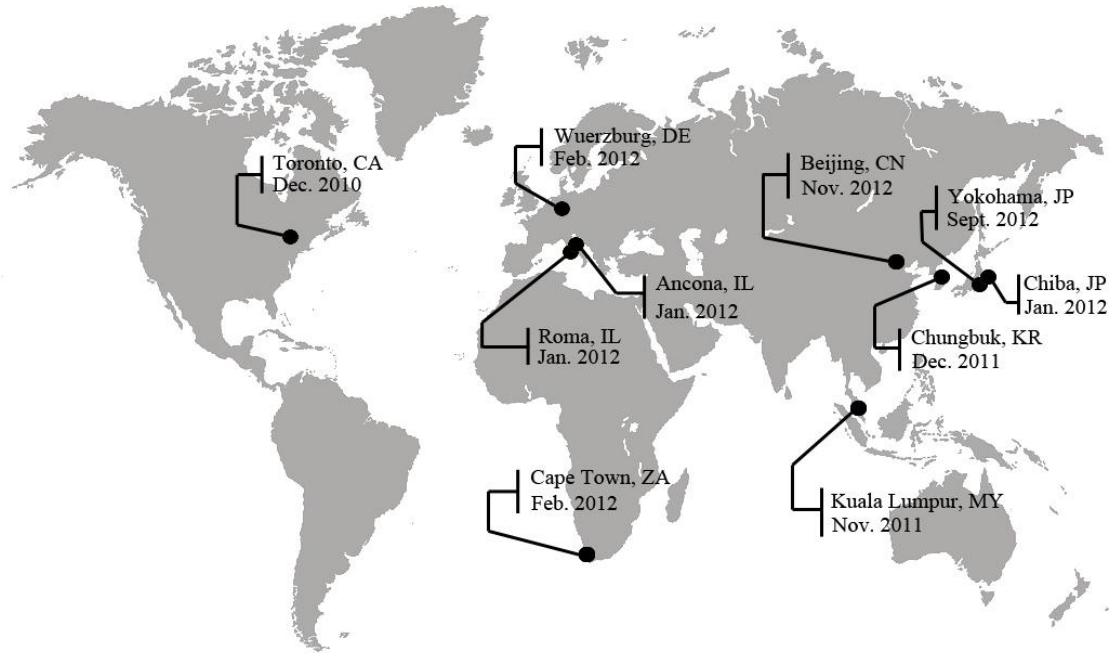

**Supplementary Figure S1** Geographical distribution of the ON1 genotype sequences. The locations from which ON1 sequences have been reported are indicated by the dots in the map, with city names and collection-date besides them. The abbreviations of collection-country names are: Canada (CA), China (CN), Germany (DE), Italy (IL), Japan (JP), South Korea (KR), Malaysia (MY) and South Africa (ZA).
